# Supplementary material
Source: PubMed Central journal article supplement (PMC3576631)
Supplement: NIHMS51598-supplement-nmeth_1521-S1.pdf [file NIHMS51598-supplement-nmeth_1521-S1.pdf]

## Dual RMCE for efficient re-engineering of mouse mutant alleles

Marco Osterwalder, Antonella Galli, Barry Rosen, William C Skarnes, Rolf Zeller & Javier Lopez-Rios

|                               |                                                                                                                           |
|-------------------------------|---------------------------------------------------------------------------------------------------------------------------|
| <b>Supplementary Figure 1</b> | The dRMCE tool-kit                                                                                                        |
| <b>Supplementary Figure 2</b> | Differential reporter activity distinguishes different types of mixed colonies                                            |
| <b>Supplementary Figure 3</b> | D RMCE works efficiently with promoter –driven IKMC knockout-first alleles                                                |
| <b>Supplementary Figure 4</b> | No random integration of the dRMCE plasmids in Hand2FLAG/+ mouse embryonic stem cell clones                               |
| <b>Supplementary Figure 5</b> | Hand2 expression in limb bud of mouse embryos                                                                             |
| <b>Supplementary Table 1</b>  | Frequencies of dRMCE-mediated correct replacement at the Smad4, Zfp503, Hand2 and Gli3 loci in mouse embryonic stem cells |
| <b>Supplementary Table 2</b>  | Sequences of the PCR primers used in this study                                                                           |

*Note: Supplementary Data is available on the Nature Methods website.*

## Supplementary Figure 1. The dRMCE tool-kit.

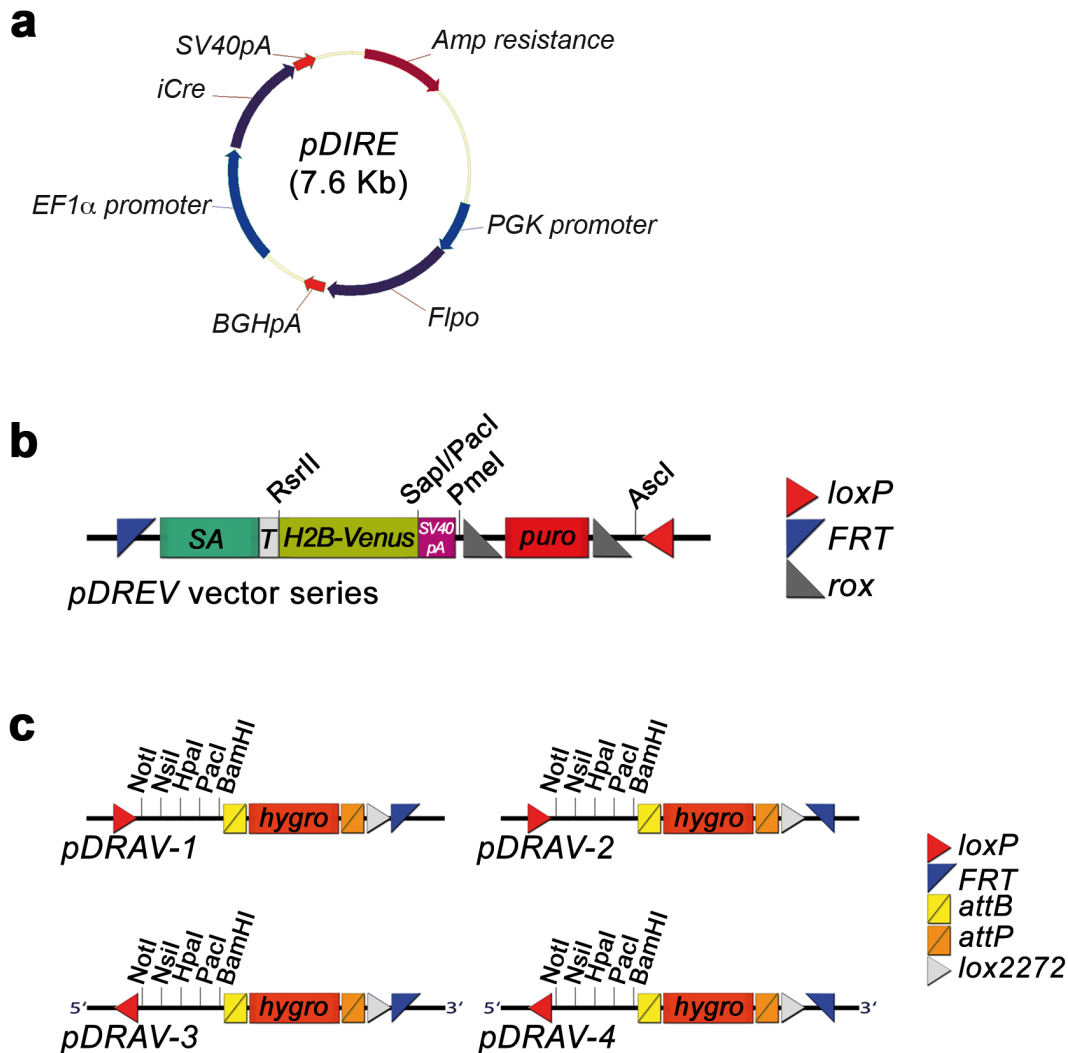

(a) Map of the *pDIRE* (plasmid Dual Improved Recombinase Expression) vector. Simultaneous expression of both iCre and Flpo recombinases in mouse embryonic stem cells is achieved by the use of heterologous promoters (*PGK-Flpo*; *EF1α-iCre*). (b) The *pDREV* (plasmid Dual Recombinase EuComm Vector) series encode a 5' *FRT* site and 3' *loxP* site for re-engineering of the IKMC knockout first alleles. These plasmids encode the T2A self-cleaving peptide (T) and H2B-Venus fluorescent reporter fused in-frame to the splice acceptor of the mouse *En2* gene followed by the *SV40* polyadenylation site and *PGK-puromycin* selection cassette (flanked by *rox* sites). The *H2B-Venus* coding sequence can be substituted by any coding sequences of choice in a single cloning step. (c) The *pDRAV* (plasmid Dual Recombinase Aceptor Vector) series encodes the *loxP* and *FRT* sites in all possible orientations. The *PGK-hygromycin* selection cassette is flanked by  $\phi$ 31 target sites. A *lox2272* site has also been inserted to enable subsequent engineering. The polylinker in the *pDRAV* series provides the necessary versatility for rapid generation of custom-designed dRMCE replacement vectors. The complete sequences of the *pDIRE*, *pDREV* and *pDRAV* vectors are included as a **Supplementary Data File**.

**Supplementary Figure 2.** Differential reporter activity distinguishes different types of mixed colonies.

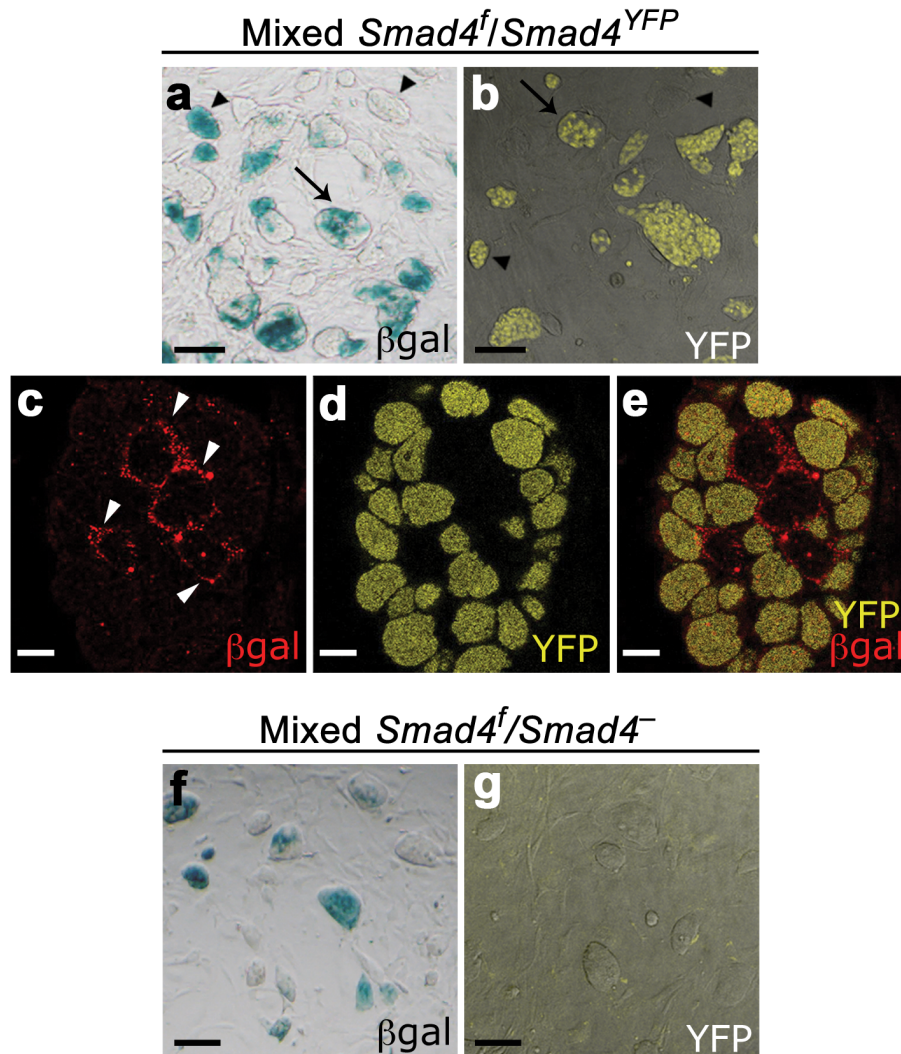

(**a**, **b**) Colony 2 is composed of both  $\beta$ -galactosidase (*Smad4<sup>f</sup>*) and YFP-positive cells (*Smad4<sup>YFP</sup>* allele) in agreement with PCR analysis (**Fig. 1c**). Some colonies are mixed (arrows), while others are either completely  $\beta$ -galactosidase or YFP-positive (arrowheads). (**c**, **d**, **e**) Co-immunolocalization of  $\beta$ -galactosidase (red) and YFP (yellow) in a mixed colony reveals that cells either express one or the other reporter (see panel **e**).  $\beta$ -galactosidase localizes to the cytoplasm (white arrowheads in panel **c**), while the YFP protein is nuclear. (**f**, **g**) In a mixed colony composed of heterozygous *Smad4<sup>-</sup>* and *Smad4<sup>f</sup>* cells, some cells retain  $\beta$ -galactosidase while no YFP fluorescence is detected. Scale bars: 100  $\mu$ m (panels **a**, **b**, **f** and **g**); 10  $\mu$ m (panels **c**-**e**).

**Supplementary Figure 3.** dRMCE works efficiently with promoter-driven IKMC knockout-first alleles.

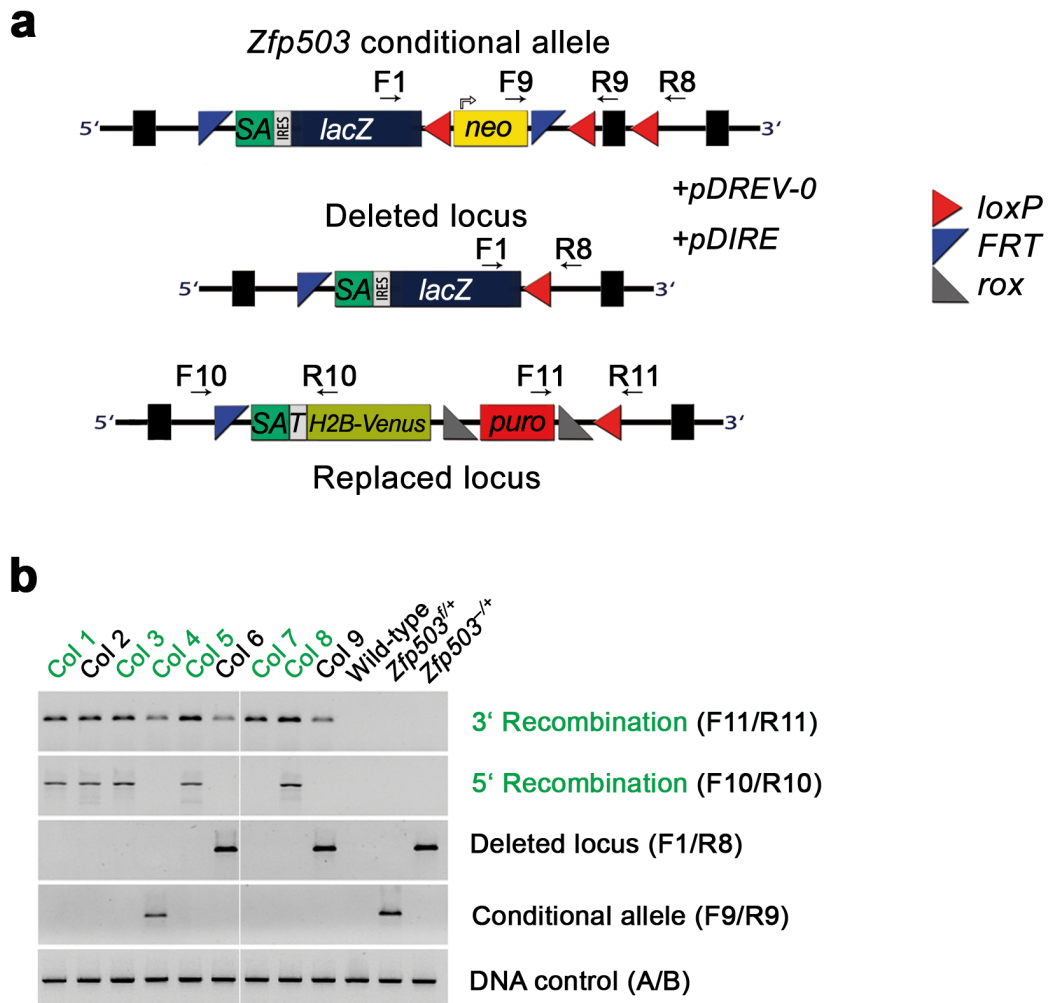

(a) Scheme of the dRMCE strategy for the *Zfp503* conditional allele (*Zfp503<sup>f</sup>*), which encodes three *loxP* sites. The scheme illustrates the likely sequence of complete *cis*-deletion and subsequent *trans*-insertion that results in correct replacement and generation of the *Zfp503<sup>YFP</sup>* allele. (b) PCR screening reveals the high frequency of clones with correct replacement (indicated in green) and some clones with only partial or no replacement. Detection of  $\beta$ -galactosidase activity or YFP fluorescence is not possible as *Zfp503* is not expressed by mouse embryonic stem cells. 3'Recombination, 5'Recombination: correct replacement at the 3' and 5' end, respectively.

**Supplementary Figure 4.** No random integration of the dRMCE plasmids in *Hand2*<sup>FLAG/+</sup> mouse embryonic stem cell clones.

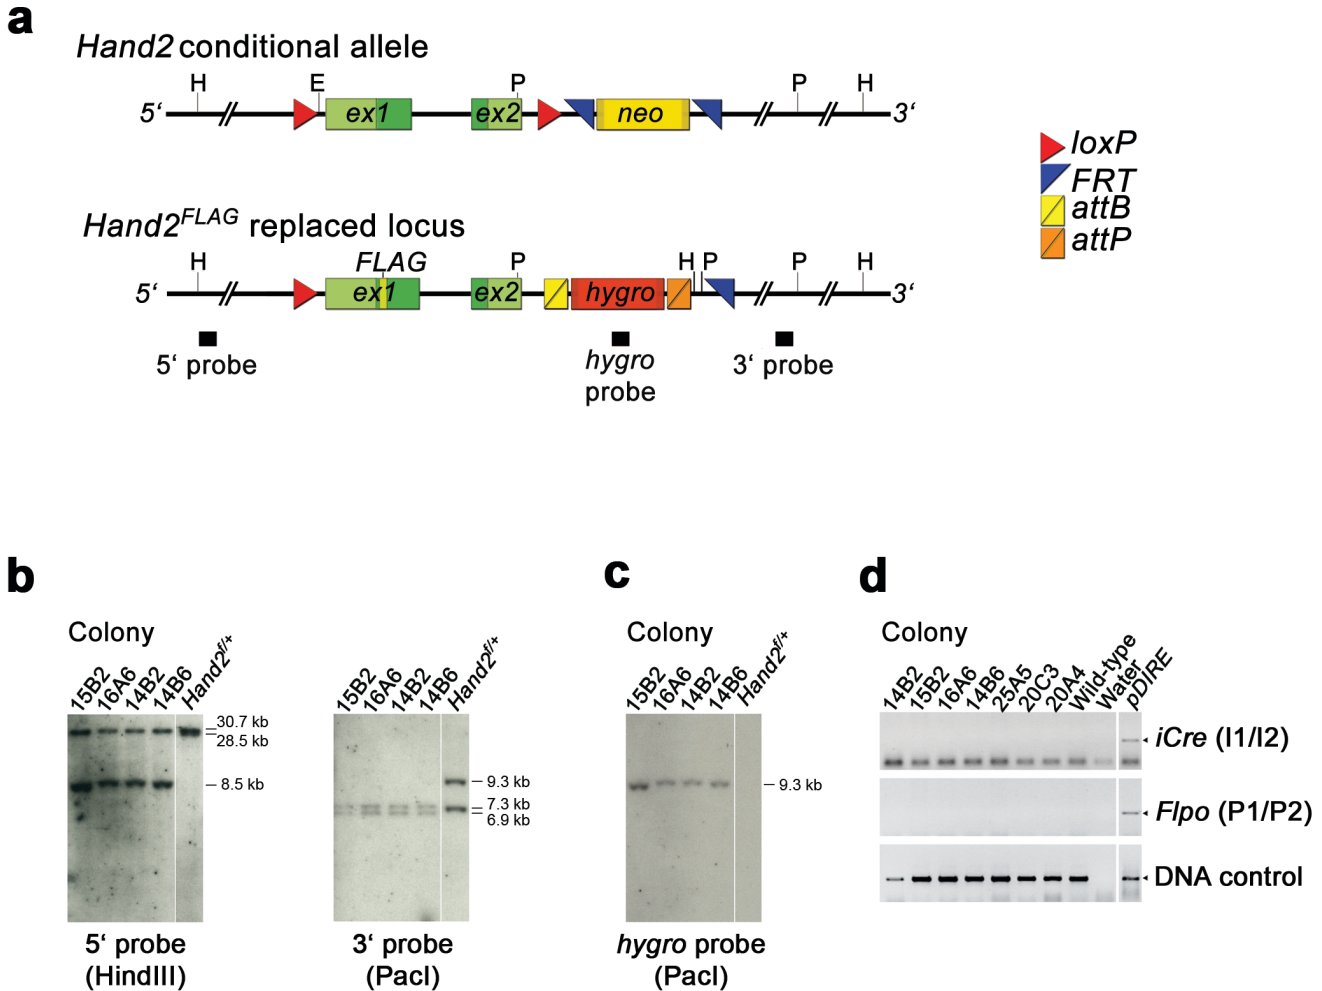

(a) Schematic view of the *Hand2*<sup>f</sup> and *Hand2*<sup>FLAG</sup> alleles. The positions of restriction sites and the probes used for Southern blot analysis are indicated. H: HindIII, E: EcoRV, P: PacI. (b) Southern blot analysis confirms that replacement occurred correctly at the 5' (8.5 kb band) and 3' (6.9 kb band) ends and reveals the integrity of the *Hand2*<sup>FLAG</sup> locus. (c) A single copy of the *hygromycin*-resistance cassette is present in all *Hand2*<sup>FLAG</sup> clones. (d) PCR primers that amplify *iCre* and *Flpo* sequences fail to detect *pDIRE* sequences in *Hand2*<sup>FLAG</sup> clones.

**Supplementary Figure 5.** *Hand2* expression in limb buds of mouse embryos.

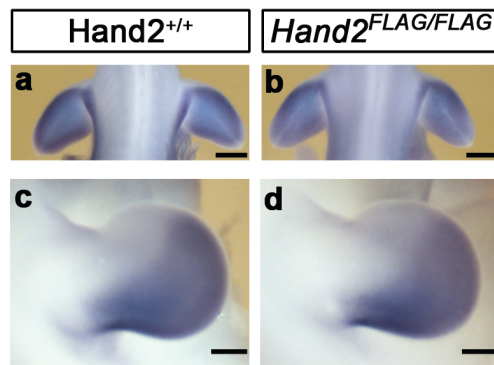

**(a, b)** Forelimbs of wild-type (*Hand2*<sup>+/+</sup>) and *Hand2*<sup>FLAG/FLAG</sup> mouse embryos at ~E10.5 (posterior view). **(c, d)** Forelimbs of mouse embryos of both genotypes at ~E11.5 (oriented with anterior to the top, posterior to the bottom). Scale bars: 200  $\mu\text{m}$  (panels **a, b**); 500  $\mu\text{m}$  (panels **c, d**).

**Supplementary Table 1.** Frequencies of dRMCE-mediated correct replacement at the *Smad4*, *Zfp503*, *Hand2* and *Gli3* loci in mouse embryonic stem cells.

| <b>Gene Locus</b> | <b>Number of Colonies</b> | <b>Correct Replacement</b> | <b>Mixed Colonies</b> | <b>Negative</b> |
|-------------------|---------------------------|----------------------------|-----------------------|-----------------|
| <i>Smad4</i>      | 48                        | 33 (69%)                   | 5                     | 10              |
| <i>Zfp503</i>     | 48                        | 25 (52%)                   | 0                     | 23              |
| <i>Hand2</i>      | 343                       | 43 (13%)                   | 11                    | 289             |
| <i>Gli3</i>       | 113                       | 37 (33%)                   | 0                     | 76              |

**Supplementary Table 2.** Sequences of the PCR primers used in this study and primer pairs/amplicon sizes that were designed to specifically detect the different alleles of the *Smad4*, *Zfp503* and *Hand2* loci.

### Primers of general use

#### *In IKMC knockout-first alleles*

| Primer | Sequence              |
|--------|-----------------------|
| F1     | AGCAGAGCGGGTAAACTGGC  |
| R1     | GCATCAGAGCAGCCGATTGTC |
| F9     | CCAACCTGCCATCACGAGATT |

#### *In pDREV*

| Primer | Sequence                 |
|--------|--------------------------|
| R3     | TGGACGAAATGCCGGTGTCA     |
| F4     | GCAAAACCAAATTAAGGGCCA    |
| R10    | TGGACCTGCTTCAGAACCTTGTA  |
| F11    | CTCTTGATTCCCACTTTGTGGTTC |

#### *In pDRAV*

| Primer | Sequence                 |
|--------|--------------------------|
| F6     | ATGCGACGCAATCGTCCGATC    |
| R7     | CATCTGCACGAGACTAGTGAGACG |

#### *In pDIRE*

| Primer | Sequence                   |
|--------|----------------------------|
| I1     | GACTACCTCCTGTACCTGCAAGCCAG |
| I2     | CTGCCAATGTGGATCAGCATTCTC   |
| P1     | CAGCCTGAGCTTCGACATCGTGAAC  |
| P2     | CTCAGGAACTCGTCCAGGTACACC   |

### Locus specific primers

| Primer | Sequence                                 |
|--------|------------------------------------------|
| F2     | AACTAACTCTGTGTTTCAGAGCCCCG               |
| R2     | GCTGCCCAAATCAATAGCCA                     |
| F3     | GCAATCCAAACCAAGCATTGTC                   |
| F5     | CCTCGGCAATTAGCAACGTGAACATC               |
| R5     | GTCTCGCTCCTCAGGCTCTCTCG                  |
| R6     | CCCTCCTCCACCACCACTGCTCAT                 |
| F7     | CTGTGCCTGGTGCTTCGTTTTGTG                 |
| R8     | TTGAACTGCGAACAGGGGAA                     |
| R9     | TTCTGAGGAAGGCGACTTTGG                    |
| F10    | CTTCCTGTGGGGTTTCTTTC                     |
| R11    | GCACAAAACGAAACTCAAACGC                   |
| A      | TCCAAGTCGATGGATATGCAACG ( <i>Grem1</i> ) |
| B      | ATGAATCGCACCGCATACACTG ( <i>Grem1</i> )  |



## Locus specific amplicons

### *Smad4* locus

| Primer pair | Allele                           | Size   |
|-------------|----------------------------------|--------|
| F4/R2       | <i>Smad4</i> <sup>YFP</sup> (3') | 456bp  |
| F3/R3       | <i>Smad4</i> <sup>YFP</sup> (5') | 1594bp |
| F2/R2       | <i>Smad4</i> <sup>-</sup>        | 565bp  |
|             | <i>Smad4</i> <sup>wt</sup>       | 1265bp |
| F1/R1       | <i>Smad4</i> <sup>f</sup>        | 558bp  |

### *Zfp503* locus

| Primer pair | Allele                            | Size   |
|-------------|-----------------------------------|--------|
| F11/R11     | <i>Zfp503</i> <sup>YFP</sup> (3') | 396bp  |
| F10/R10     | <i>Zfp503</i> <sup>YFP</sup> (5') | 1449bp |
| F1/R8       | <i>Zfp503</i> <sup>-</sup>        | 987bp  |
| F9/R9       | <i>Zfp503</i> <sup>f</sup>        | 599bp  |

### *Hand2* locus

| Primer pair | Allele                              | Size                           |
|-------------|-------------------------------------|--------------------------------|
| F6/R6       | <i>Hand2</i> <sup>FLAG</sup> (3')   | 965bp                          |
| F5/R5       | <i>Hand2</i> <sup>FLAG</sup> (5')   | 435bp                          |
| F5/R5       | <i>Hand2</i> <sup>f</sup> (5')      | 435bp<br>(EcoRV: 340bp + 95bp) |
| F5/R6       | <i>Hand2</i> <sup>-</sup>           | 411bp                          |
| F7/R6       | <i>Hand2</i> <sup>wt</sup>          | 240bp                          |
| F7/R7       | <i>Hand2</i> <sup>FLAG</sup> (mice) | 404bp                          |
